# Supplementary material for: Fast, cheap and easy routine quantification method for atrazine and its transformation products in water matrixes using a DLLME-GC/MS method
Source: Royal Society of Chemistry journal article supplement (doi:10.1039/c8ay02227e), 2018-01-01
Supplement: c8ay02227e1.pdf [file c8ay02227e1.pdf]

## Supplementary Information (SI)

### **Fast, Cheap and Easy routine quantification method for atrazine and its transformation products in water matrixes using DLLME-GC/MS method**

Alexandre Della-Flora<sup>a</sup>, Raquel W. Becker<sup>a</sup>, Marco F. Ferrão<sup>a</sup>, Aline T. Toci<sup>b</sup>, Gilcélia A. Cordeiro<sup>b</sup>, Marcela Boroski<sup>b</sup>, Carla Sirtori<sup>a\*</sup>

*<sup>a</sup>Instituto de Química. Universidade Federal do Rio Grande do Sul. Av. Bento Gonçalves*

*9500. CEP 91501-970. Porto Alegre. RS. Brazil.*

*<sup>b</sup>Federal University of Latin American Integration (UNILA). 6731 Tancredo Neves Av. Foz do*

*Iguaçu. PR. 85867-970. Brazil.*

## Analysis of Variance (ANOVA) for ATZ. DEA and DIA extractions

**Table S1.** Analysis of variance (ANOVA) for extraction of ATZ by DLLME using quadratic model Doehlert matrix.

| Source of Variation           | SS    | df | MS   | Fcal  |           | p      |
|-------------------------------|-------|----|------|-------|-----------|--------|
| Regression                    | 17.97 | 9  | 2.00 | 13.82 | <b>SG</b> | 0.0003 |
| Residual                      | 1.30  | 9  | 0.14 |       |           |        |
| Lack-of-fit                   | 0.41  | 3  | 0.13 | 0.90  |           | 0.4950 |
| Pure Error                    | 0.90  | 6  | 0.15 |       |           |        |
| Total SS                      | 19.27 | 18 |      |       |           |        |
| % Explained Variation         |       |    |      | 93.25 |           |        |
| % Maximum Explained Variation |       |    |      | 95.34 |           |        |

Where: SS: Sums of Squares; df: Degree of Freedom; MS: Mean Square; Fcalc: calculated F value; p: significance level; SG: Significant.

**Table S2.** Analysis of variance (ANOVA) for extraction of DEA by DLLME using quadratic model Doehlert matrix.

| Source of Variation           | SS     | df | MS    | Fcal  |           | p       |
|-------------------------------|--------|----|-------|-------|-----------|---------|
| Regression                    | 234.00 | 9  | 26.00 | 21.29 | <b>SG</b> | 0.00005 |
| Residual                      | 11.00  | 9  | 1.22  |       |           |         |
| Lack-of-fit                   | 3.53   | 3  | 1.18  | 0.95  |           | 0.475   |
| Pure Error                    | 7.46   | 6  | 1.24  |       |           |         |
| Total SS                      | 245.00 | 18 |       |       |           |         |
| % Explained Variation         |        |    |       | 95.51 |           |         |
| % Maximum Explained Variation |        |    |       | 96.96 |           |         |

Where: SS: Sums of Squares; df: Degree of Freedom; MS: Mean Square; Fcalc: calculated F value; p: significance level; SG: Significant.

**Table S3.** Analysis of variance (ANOVA) for extraction of DIA by DLLME using quadratic model Doehlert matrix.

| Source of Variation           | SS    | df | MS   | Fcal  |           | p       |
|-------------------------------|-------|----|------|-------|-----------|---------|
| Regression                    | 55.73 | 9  | 6.19 | 24.80 | <b>SG</b> | 0.00003 |
| Residual                      | 2.25  | 9  | 0.25 |       |           |         |
| Lack-of-fit                   | 0.83  | 3  | 0.28 | 1.18  |           | 0.3921  |
| Pure Error                    | 1.41  | 6  | 0.24 |       |           |         |
| Total SS                      | 57.98 | 18 |      |       |           |         |
| % Explained Variation         |       |    |      | 96.12 |           |         |
| % Maximum Explained Variation |       |    |      | 97.56 |           |         |

Where: SS: Sums of Squares; df: Degree of Freedom; MS: Mean Square; Fcalc: calculated F value; p: significance level; SG: Significant.

### Normal probability graphs of the effects of each variable

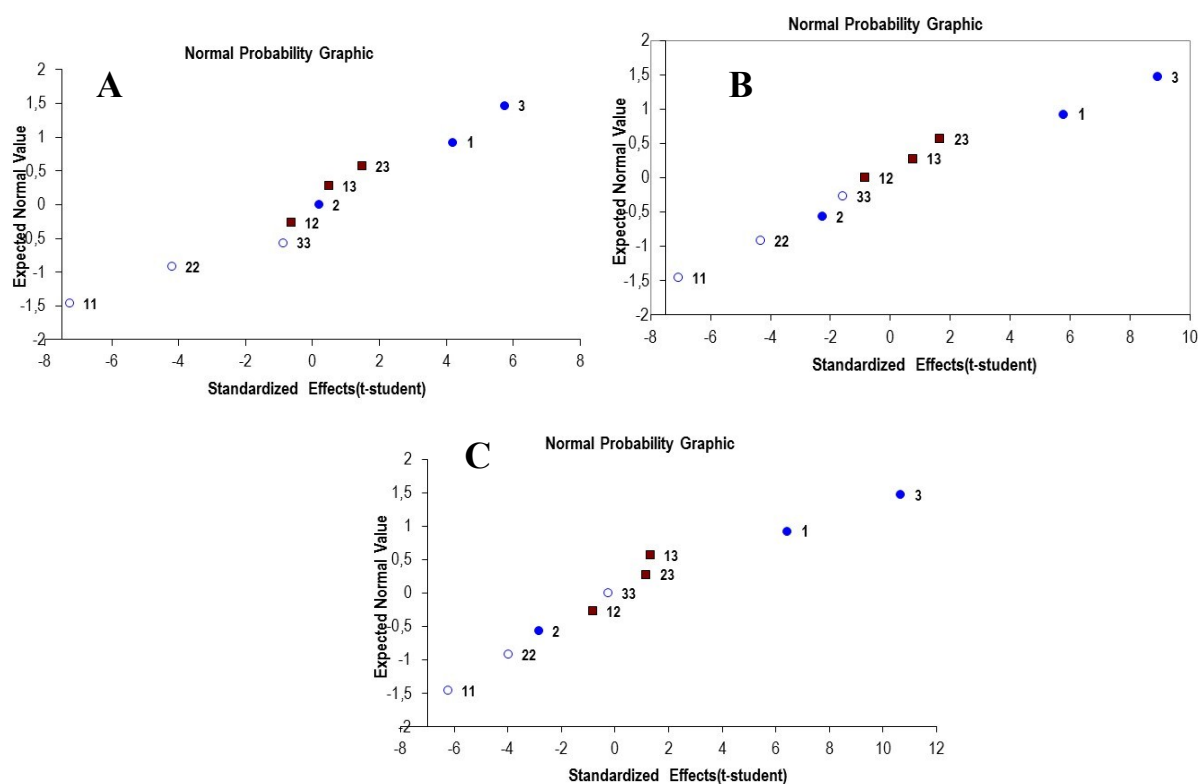

**Figure S1.** Normal probability graphs of the effects of each variable - 1) Extraction Solvent; 2) Dispersive Solvent and 3) ionic strength. For: (A) ATZ; (B) DEA and (C) DIA.

## Surface Response Study

The quadratic model was used to plot the response surface graphs represented by equations 1S and 2S. 3S and 4S. 5S and 6S for ATZ. DEA and DIA respectively. The equations 1S. 3S and 5S represent the interactions between the ionic strength and the DS. interactions of ionic strength and ES are represented by equations 2S. 4S and 6S.

$$Y = -1.27X_1^2 - 0.25X_2^2 + 0.74X_1X_2 + 0.04X_1 + 1.09X_2 + 5.60 \quad (1S)$$

$$Y = -2.21X_1^2 - 0.25X_2^2 - 0.25X_1X_2 + 0.80X_1 + 1.091X_2 + 5.60 \quad (2S)$$

$$Y = -3.784X_1^2 - 1.31X_2^2 + 2.37X_1X_2 - 1.25X_1 + 4.92X_2 + 15.03 \quad (3S)$$

$$Y = -6.26X_1^2 - 1.31X_2^2 + 1.06X_1X_2 + 3.20X_1 + 4.92X_2 + 15.03 \quad (4S)$$

$$Y = -1.60X_1^2 - 0.09X_2^2 + 0.85X_1X_2 - 0.71X_1 + 2.66X_2 + 15.03 \quad (5S)$$

$$Y = -2.49X_1^2 - 0.09X_2^2 - 0.76X_1X_2 + 1.61X_1 + 2.66X_2 + 5.83 \quad (6S)$$

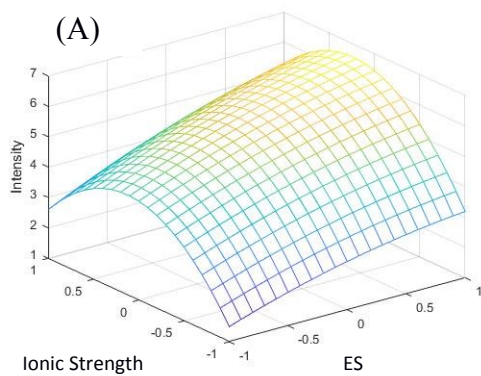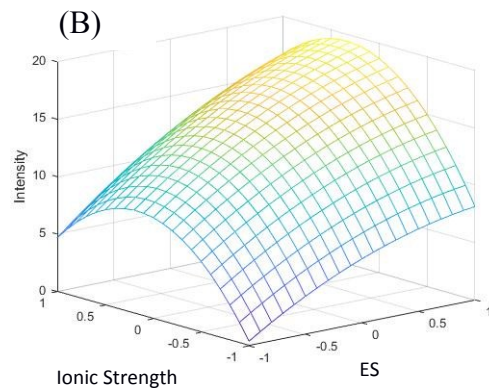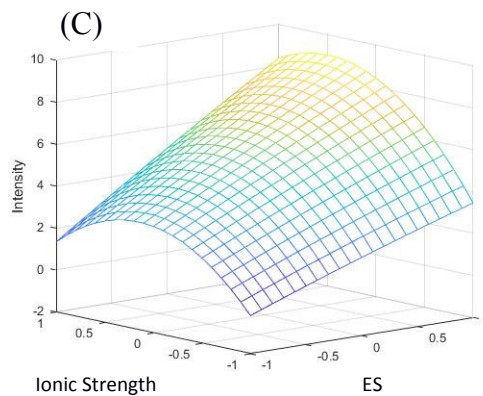

**Figure S2.** Representation of the response surfaces for the interaction between ionic strength and ES obtained for the Doehlert planning in the optimization of DLLME for: (A) ATZ; (B) DEA; (C) DIA.

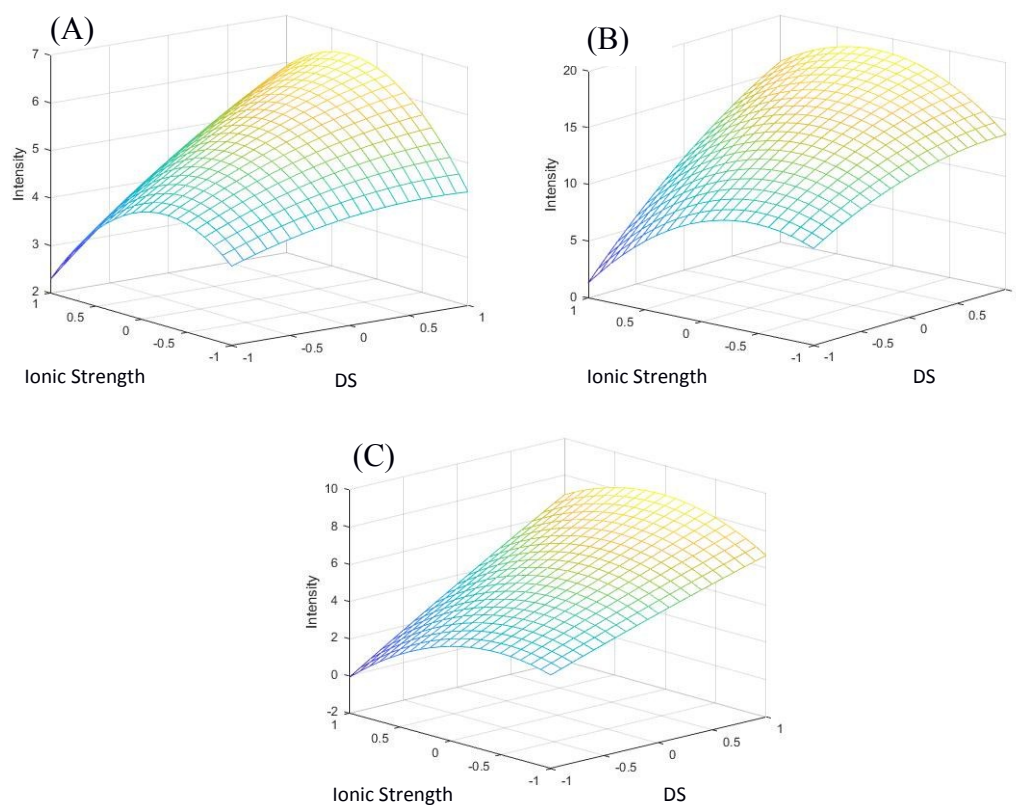

**Figure S3.** Representation of the response surfaces for the interaction between ionic strength and DS obtained for the Doehlert planning in the optimization of DLLME for: (A) ATZ; (B) DEA; (C) DIA.

## DLLME/GC-MS method validation

### Selectivity evaluation

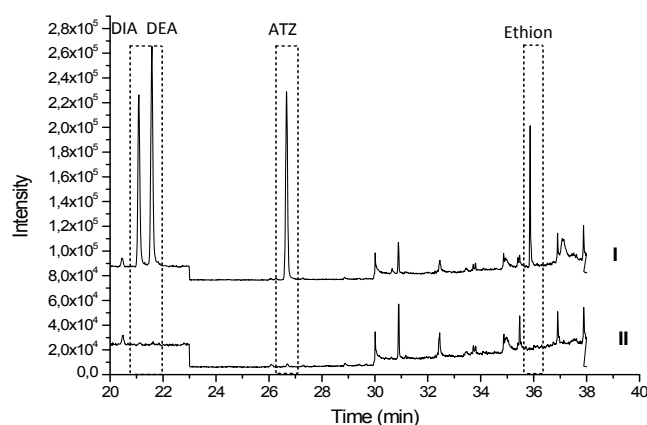

**Figure S4.** Chromatogram in: I) matrix fortified with ATZ, DEA ( $2.0\mu\text{g L}^{-1}$ ) and DIA ( $3.0\mu\text{g L}^{-1}$ ) and Ethion ( $2.0\mu\text{g L}^{-1}$ ). II) non-fortified matrix.

#### Linearity evaluation

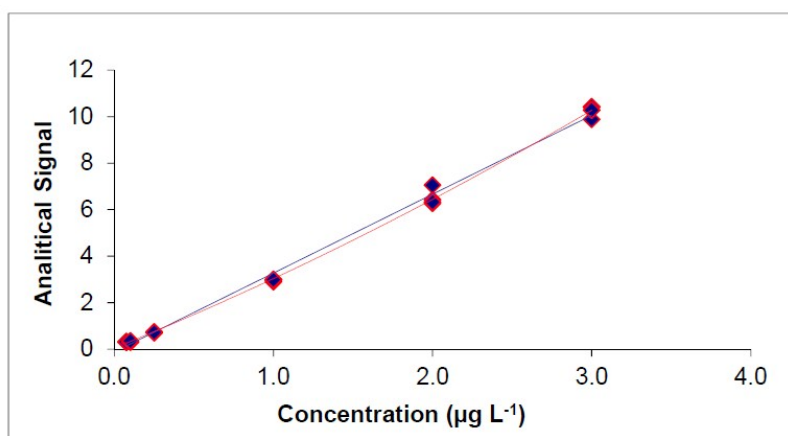

**Figure S5.** Curve ATZ in SWM.

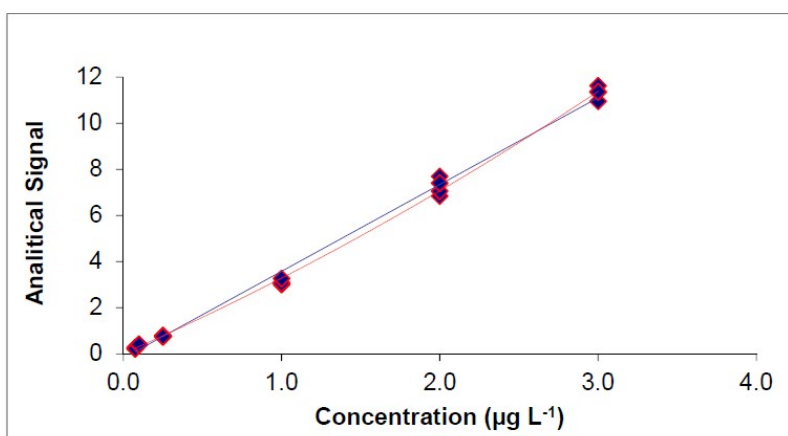

**Figure S6.** Curve DEA in SWM.

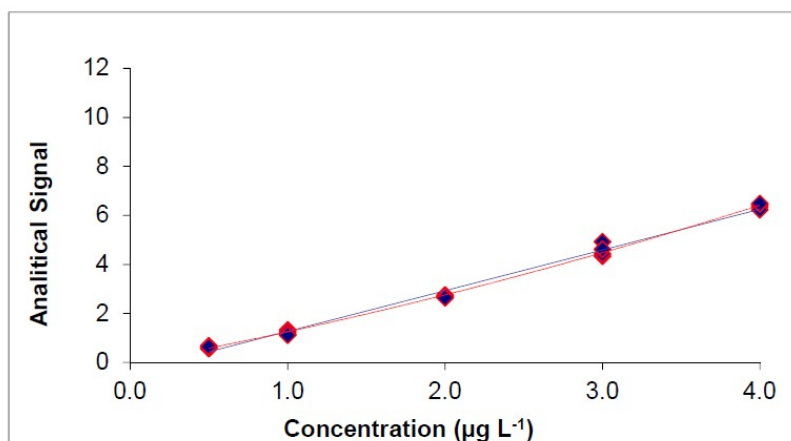

**Figure S7.** Curve DIA in SWM.

**Residue Graphs for each of the analytical curves of ATZ, DIA and DEA**

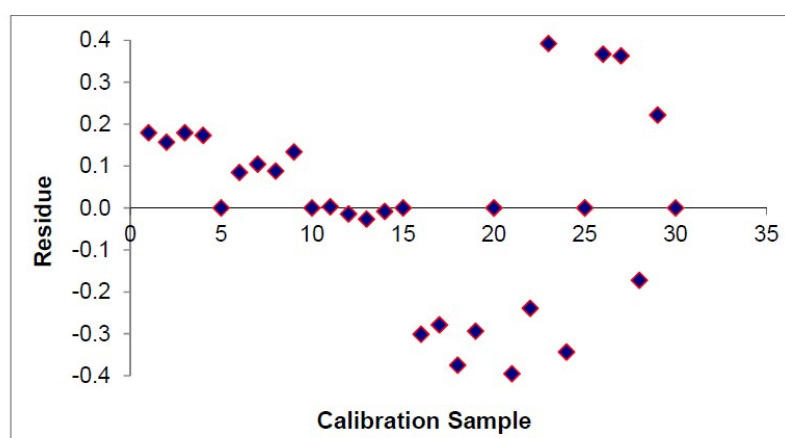

**Figure S8.** Residue for ATZ curve.

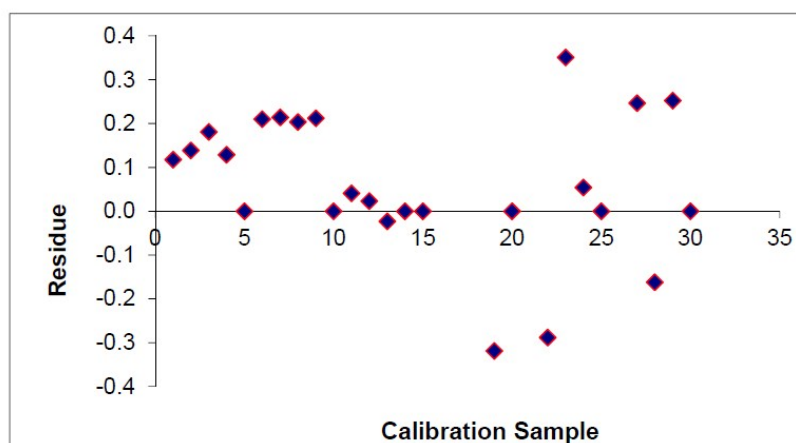

**Figure S9.** Residue for DEA curve.

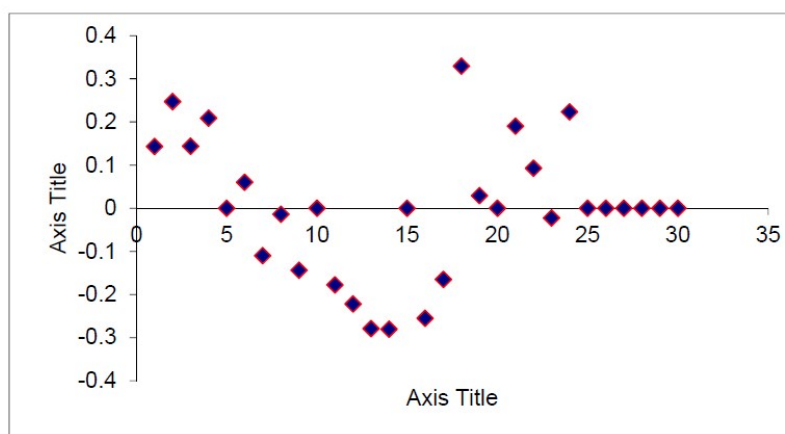

**Figure S10.** Residue for DIA curve.

## Matrix Effect Study

**Table S4.** Analytical curves elaborated for the matrix effect study in UPW and SW matrix.

| Analyte | Matrix | Linear range<br>( $\mu\text{g L}^{-1}$ ) | $R^2$  | A     | B       | error   | n  | Matrix Effects |                   |                   |
|---------|--------|------------------------------------------|--------|-------|---------|---------|----|----------------|-------------------|-------------------|
|         |        |                                          |        |       |         |         |    | nDF            | $t_{\text{calc}}$ | $t_{\text{crit}}$ |
| ATZ     | UPW    | 0.075-3.000                              | 0.9936 | 2.809 | 0.0587  | 0.0356  | 41 | 63             | 56.27             | 2.00              |
|         | SW     | 0.075-3.000                              | 0.9956 | 3.389 | -0.1098 | 0.04682 | 24 |                |                   |                   |
| DEA     | UPW    | 0.25-3.000                               | 0.9943 | 2.949 | -0.0184 | 0.04022 | 42 | 64             | 67.40             | 2.00              |
|         | SW     | 0.25-3.000                               | 0.9947 | 3.762 | -0.1833 | 0.05743 | 24 |                |                   |                   |
| DIA     | UPW    | 0.50-4.000                               | 0.9918 | 1.330 | -0.0478 | 0.02471 | 25 | 43             | 37.51             | 2.02              |
|         | SW     | 0.50-4.000                               | 0.9917 | 1.663 | -0.3973 | 0.03483 | 20 |                |                   |                   |

## Stability Study

**Table S5.** Stability study for ATZ, DEA and DIA in SWM from BP3.

| Period | ATZ | Recovery | DEA | Recovery | DIA | Recovery |
|--------|-----|----------|-----|----------|-----|----------|
|--------|-----|----------|-----|----------|-----|----------|

|                  | ( $\mu\text{g L}^{-1}$ ) | %     | ( $\mu\text{g L}^{-1}$ ) | %     | ( $\mu\text{g L}^{-1}$ ) | %     |
|------------------|--------------------------|-------|--------------------------|-------|--------------------------|-------|
| Week 0           | 1.21 <sup>a</sup>        | -     | 1.12 <sup>a</sup>        | -     | 1.20 <sup>a</sup>        | -     |
| Week 1           | 1.25 <sup>a</sup>        | 103.3 | 1.20 <sup>a</sup>        | 108.0 | 1.27 <sup>a</sup>        | 105.5 |
| Week 2           | 1.18 <sup>a</sup>        | 97.1  | 1.21 <sup>a</sup>        | 108.3 | 1.30 <sup>a</sup>        | 108.1 |
| Week 3           | 0.97 <sup>a</sup>        | 80.3  | 1.04 <sup>a</sup>        | 93.4  | 1.25 <sup>a</sup>        | 103.5 |
| Week 4 (Month 1) | 1.11 <sup>a</sup>        | 91.2  | 1.04 <sup>a</sup>        | 92.8  | 1.13 <sup>a</sup>        | 93.9  |
| Month 2          | 1.10 <sup>a</sup>        | 90.9  | 1.01 <sup>a</sup>        | 90.2  | 0.99 <sup>a</sup>        | 82.0  |

Analysis performed in two replicates. Equal lowercase letters in the same column indicate that no significant differences between weeks ( $p < 0.5$ ) was verified.
